# Supplementary material
Source: HighWire-hosted journal article supplement (https://bmjopen.bmj.com/content/15/2/e094343)
Supplement: inline-supplementary-material-2 [file inline-supplementary-material-2.pdf]

Rodriguez-Justo M, et al. *BMJ Open* 2025; 15:e094343. doi: 10.1136/bmjopen-2024-094343
